# Supplementary material
Source: publisher figshare collection journal article supplement (https://karger.figshare.com/ndownloader/files/28376901)
Supplement: Supplementary file 1 [file 28376901]

| **Author / title** | **inclusion** | | **comment** | **number of patient / contacts** | **time from surgery (months)** | **uni / bilateral** | **ipsilateral STN** | **short / long- term** | **methods** | **type of assessment** | **motor outcome** | **medication during assessment** | **reference** | **STN boundaries relative to contact i.e Analysis of anatomical location** | **automatized or manual** | **normalisation** | **if Atlas, registration (rigid/elastic)** | **electrode localization** | **automatized or manual** | **VTA method** | **encapsulation layer - impedance** | **White-Grey matter distinction / use of tissue diffusivity** | **results simplified** |
| --- | --- | --- | --- | --- | --- | --- | --- | --- | --- | --- | --- | --- | --- | --- | --- | --- | --- | --- | --- | --- | --- | --- | --- |
| **Butson et al. Neuroimage. 2007** | 0 | | insufficient number of patient, descriptive study | 1 / 4 contacts, monopolar review, 36 VTAs | 12 | bilateral stimulation, left STN studied | not specified | acute | monopolar review on the left electrode with varying amplitudes | best VTA location | contralateral bradykinesia measured with gyroscopes / rigidity measured with impedance measurement device | OFF medication | comparison between each contact at various voltages | Atlas | semi-automatized | N/A, one patient | non-linear vector field based algorithm registration | MRI | manual, progressive iso-surfacing until the artefact is restricted to the four contacts | FEMs that incorporate patient specific DTI-based tissue anisotropy | 500μm thick encapsulation layer with conductivity 0.07 S/m | patient specific DTI / Yes | **ZI/H2** |
| **Maks et al. J Neurol Neurosurg Psychiatry. 2009** | 0 | | insufficient number of patient, time of assessment not specified, descriptive study | 10 / 10 | several months, not further specified | unilateral implantation | N/A | chronic | VTA corresponding to clinical settings | chronic VTA location | total UPDRS-III, unilateral stimulation | OFF medication | post-operative OFF medication OFF stimulation | MRI and MER combined with atlas | semi automatized | VTA position described individually in each patient | linear co-registration from atlas to patient's MRI | CT scan | manual using frame based coordinate of the trajectory and direct visualisation of the artefact on CT | FEMs that incorporate DTI-based tissue anisotropy from a DTI atlas brain | 500μm thick encapsulation layer with conductivity 0.08 S/m | DTI atlas / Yes | **80% of patients with good outcome had more than 50% their VTA outside of the STN** |
| **Butson et al. Neuroimage. 2011** | 0 | | insufficient number of patient, acute study with ipsilateral STN stimulation kept ON during lateralised assessment, but lateralised score | 6 / 28 contacts (7 leads), 163 VTAs | >6 | all bilateral, but only one patient studied on both sides | kept ON using the clinical settings | acute | prospective clinical evaluation of 163 different settings on 28 contacts | functional atlas | contralateral bradykinesia measured with gyroscopes / rigidity measured with impedance measurement device) | OFF medication | relative to OFF medication and contralateral OFF stimulation, post operatively | Atlas | semi-automatized | weighted sum of the distance from the electrode contact to the surface points on the 3D surfaces used to place the electrode in the context of the atlas brain | non-linear vector field based algorithm registration of the atlas on patients' MRI | MRI | manual, progressive iso-surfacing until the artefact is restricted to the four contacts | FEMs that incorporate patient specific DTI-based tissue anisotropy | 500μm thick encapsulation layer with conductivity 0.09 S/m | patient specific DTI / Yes | **white matter dorsal to STN** |
| **Akram et al. Neuroimage. 2017** | 1 | | VTA model: fixed impedance, homogeneous and isotropic tissue | 20 / 40 contacts, 640 VTAs | 12 | bilateral | OFF | acute | voxel-based statistical analysis of volumes of tissue activated models, cluster map | functional atlas | contralateral (upper limb) rigidity, bradykinesia and tremor scores from UPDRS-III | OFF medication | OFF medication and OFF stimulation postoperative? | MRI | manual | normalized to common MNI space | two steps with linear and non-linear co-registration | MRI | manual, after pre and post implantation scans co-registration, by fitting the electrode model (3389) into the post implantation MR lead artefact | SureTune (FEM, homogeneous and isotropic tissue model) | fixed impedance of 1000Ohm | No / No | **Supero-lateral STN / superior border of the STN and for rigidity extension to ZI/H2** |
| **Conrad et al. Stereotact Funct Neurosurg. 2018** | 0 | | simplified VTA model, total UPDRS-III with confounding effect of bilateral stimulation | 20 / 38 | 6 | bilateral | N/A | chronic | map the optimal locus of stimulation relative to the midpoint of the MR-visualized STN, in three-dimensional space | functional map | Total UPDR-III for 4 patients and total MDS-UPDRS-III for 16 patients | OFF medication | Post-operative OFF medication OFF stimulation and ON stimulation | MRI, volume of analysis from –5 to +5 mm about the STN midpoint in the supero-inferior, medio-lateral, and antero-posterior directions, in 0.5-mm increments | manual | no normalisation, results expressed from each STN midpoint | N/A | CT scan | manual, using CT to MR co-registration, CT windowing was set to maximize visualization of individual DBS electrode contacts | Simplified computational electrical field model, based on the probability for each contact to activate a neuron at a given location | constant b in the equation of 0,09V (for distance = 0mm) | No / No | **optimal site is visualized here in a region that is lateral, posterior and superior to the STN midpoint** |
| **Haegelen et al. Plos One. 2018** | 0 | | descriptive study, no statistical voxel analysis, total UPDRS-III combined with bilateral stimulation, no statistical analysis of voxels, predefined volume of tissue activated without taking into account individual stimulation settings | 42 / 84 | 6 | bilateral | N/A | chronic | functional Atlas using active contact and modelling the electric field using a single pre-defined 3D Gaussian | functional atlas | total UPDRS-III | OFF medication | compared to pre-operative OFF medication | Atlas | automatized | normalized to ParkMedAtlis template | combinations of linear and non-linear registrations | CT scan | Automatized using the CT generated artefact and applying the known geometry of the electrode model (3389). Validation cited (Mehri et al. 2012). Description in Lalys et al. 2013 | Electric field modelled using a single pre-defined 3D Gaussian (3mm) | No | No / No | **Supero-lateral STN** |
| **Mosley et al. NeuroImage. 2018** | 0 | | early assessment, assessment ON medication which induce variability as ON is not a stable state, total UPDRS-III combined with bilateral stimulation | 64 / 128 | week 6 and 13 | bilateral | N/A | chronic | Voxel-based statistical analysis based on VTA and active contact location using stimulation parameters | functional atlas | total UPDRS-III | ON medication | ON medication preoperatively | Atlas | automatized | normalisation to common MNI space | non-linear diffeomorphic registration to atlas using DARTEL | CT scan | manual localisation with and correction for brainshift by applying a refined affine transform | VTA method from lead DBS software, heuristic model (Madler and Coenen 2012) | for Boston devices, constant current, when constant voltage (Medtronic), fixed impedances are employed | No / No | **right STN motor sub-region (dorsolateral STN)** |
| **Dembek TA et al. Ann Neurol. 2019*** | 1 | | high number of VTA | 21 / 26 leads, 99 contacts, 449 settings | >3 | both, most affected side only (16/21) and both sides for 5/21 | kept ON using the clinical settings | acute | voxel-based statistical analysis associated with rigidity, bradykinesia and tremor improvement and correlation between VTA/sweet spot overlap and outcome in validation cohort | functional atlas | contralateral rigidity, akinesia, and tremor from the UPDRS-III score | OFF medication ON stimulation | post op OFF medication OFF stimulation | Atlas | automatized | normalisation to common MNI space | symmetric diffeomorphic registration approach (SyN) implemented in ANTs and “subcortical refine" | CT scan | Automatized (PACER algorithm) / orientation of the lead using DiODE algorithm | VTA method from lead DBS software, FEM based (Horn et al. 2017) | constant current stimulation | Yes / No | **dorsolateral STN and surrounding white matter** |
| **Jan Niklas Petry-Schmelzer et al. Brain 2019*** | | 0 | total SCOPA-A combined with bilateral stimulation, assessment ON medication non motor symptoms were the primary study goal, VTA model with homogeneous and isotropic tissue | 91 / 182 | 6 | bilateral | N/A | chronic | probabilistic stimulation map generated for each investigated clinical scale using VTA | functional atlas | total SCOPA-A | ON medication | compared to ON medication before surgery, LEDD reduction | Atlas | automatized | normalisation to common MNI space | symmetric diffeomorphic registration approach (SyN) implemented in ANTs and “subcortical refine" | MRI or CT scan | Automatized (PACER algorithm) / orientation of the lead using DiODE algorithm. Semi automatized using TRAC/CORE when using MRI | VTA method from lead DBS software, FEM based (Horn et al. 2017) | for Boston devices, constant current, when constant voltage (Medtronic), fixed impedances are employed | No (homogenous tissue with a conductivity of = 0.1 S/m, Astrom et al., 2015) / No | **dorsolateral STN (based on LEDD)** |
| **Nguyen et al. Brain Stimulation. 2019*** | | 1 | directional contacts, high number of VTA | 28 / 272 directional contacts settings and 50 omni-directional configurations (322 different stimulation settings) | 4-6, mean 24 weeks | bilateral | not specified | acute | voxel-based statistical analysis associated with rigidity improvement | functional atlas | upper limb rigidity measurements rated according to the MDS-UPDRS scale | OFF medication | OFF medication OFF stimulation? | Atlas | automatized | normalisation to MNI space | symmetric diffeomorphic registration approach (SyN) implemented in ANTs | CT scan | Automatized (PACER algorithm) / orientation of the lead orientation of the lead determined with skull X-rays in two planes | VTA method from lead DBS software, FEM based (Horn et al. 2017) | constant current stimulation | Yes / No | **dorsolateral STN** |

Supplementary table 1: VTA studies before selection. * Studies including directional (segmented) leads.
